# Supplementary material for: Deriving the hygroscopicity of ambient particles using low-cost optical particle counters
Source: Copernicus journal article supplement (doi:10.5194/amt-2024-39), 2024-03-25
Supplement: Supplementary file 1 [file amt-2024-39-supplement.pdf]

## Supplementary Material for

### 5 **Deriving the hygroscopicity of ambient particles using low-cost optical particle counters**

by

10 Wei-Chieh Huang<sup>1</sup>, Hui-Ming Hung<sup>1\*</sup>, Ching-Wei Chu<sup>1</sup>, Wei-Chun Hwang<sup>1</sup>, and Shih-Chun  
Candice Lung<sup>2</sup>

### 15 **Contents of this file**

Tables S1 to S3

Figures S1 to S8

20

**Table S1: The compared sensors in AQB and instruments of EPA for every species.**

|                 | AQB                                       | EPA               |
|-----------------|-------------------------------------------|-------------------|
| T, RH           | Seed (SHT31)                              | Metone (083D)     |
| CO              | Alphasense (CO-B4)                        | HORIBA (APMA360)  |
| NO <sub>x</sub> | Alphasense (NO-B4) for NO                 | ECOTECH (ML9841)  |
|                 | Alphasense (NO2-B431) for NO <sub>2</sub> |                   |
| O <sub>3</sub>  | Alphasense (OX-B431)                      | ECOTECH (ML9810)  |
| SO <sub>2</sub> | Alphasense (SO2-B4)                       | ECOTECH (ML9850)  |
| VOC             | Alphasense (PID-AH2)                      | Horiba (APHA 360) |
| PM              | Alphasense (OPC-N2)                       | METONE (BAM1020)  |

**Table S2: The hygroscopicity, molecular weight, and density of salts used in hygroscopicity deriving.**

| salt                                    | (NH <sub>4</sub> ) <sub>2</sub> SO <sub>4</sub> | (NH <sub>4</sub> )HSO <sub>4</sub> | NH <sub>4</sub> NO <sub>3</sub> | NaNO <sub>3</sub> | NaCl |
|-----------------------------------------|-------------------------------------------------|------------------------------------|---------------------------------|-------------------|------|
| hygroscopicity                          | 0.61                                            | 0.7                                | 0.67                            | 0.88              | 1.28 |
| molecular weight (g mol <sup>-1</sup> ) | 132                                             | 115                                | 80                              | 85                | 58.5 |
| density (g cm <sup>-3</sup> )           | 1.70                                            | 1.78                               | 1.72                            | 2.26              | 2.17 |

25

**Table S3: The correlation coefficient (r) for measured parameters between two AQB systems and between AQB #1 and TW-EPA Nanzi station**

| r                                     | AQB #1 vs AQB #2 | AQB #1 vs TW-EPA |
|---------------------------------------|------------------|------------------|
| T                                     | 0.958            | 0.948            |
| RH                                    | 0.949            | 0.932            |
| CO                                    | 0.995            | 0.976            |
| NO                                    | 0.976            | 0.624            |
| NO <sub>2</sub>                       | 0.944            | 0.504            |
| Ox (NO <sub>2</sub> +O <sub>3</sub> ) | 0.979            | 0.961            |
| VOC                                   | 0.675            | -0.373           |
| SO <sub>2</sub>                       | 0.973            | 0.343            |
| PM <sub>2.5</sub>                     | 0.978            | 0.689            |
| PM <sub>10</sub>                      | 0.967            | 0.483            |

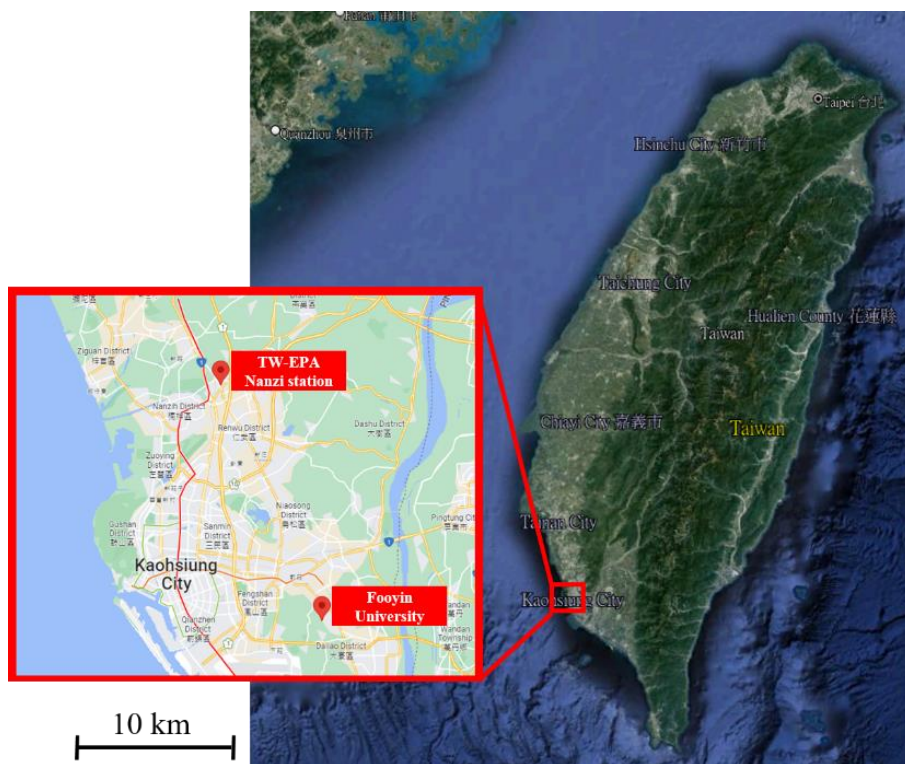

30

**Figure S1. Location of TW-EPA Nanzi station (calibration campaign) site and Fooyin University (sampling campaign). (from © Google Earth 2024 and © Google Maps 2024)**

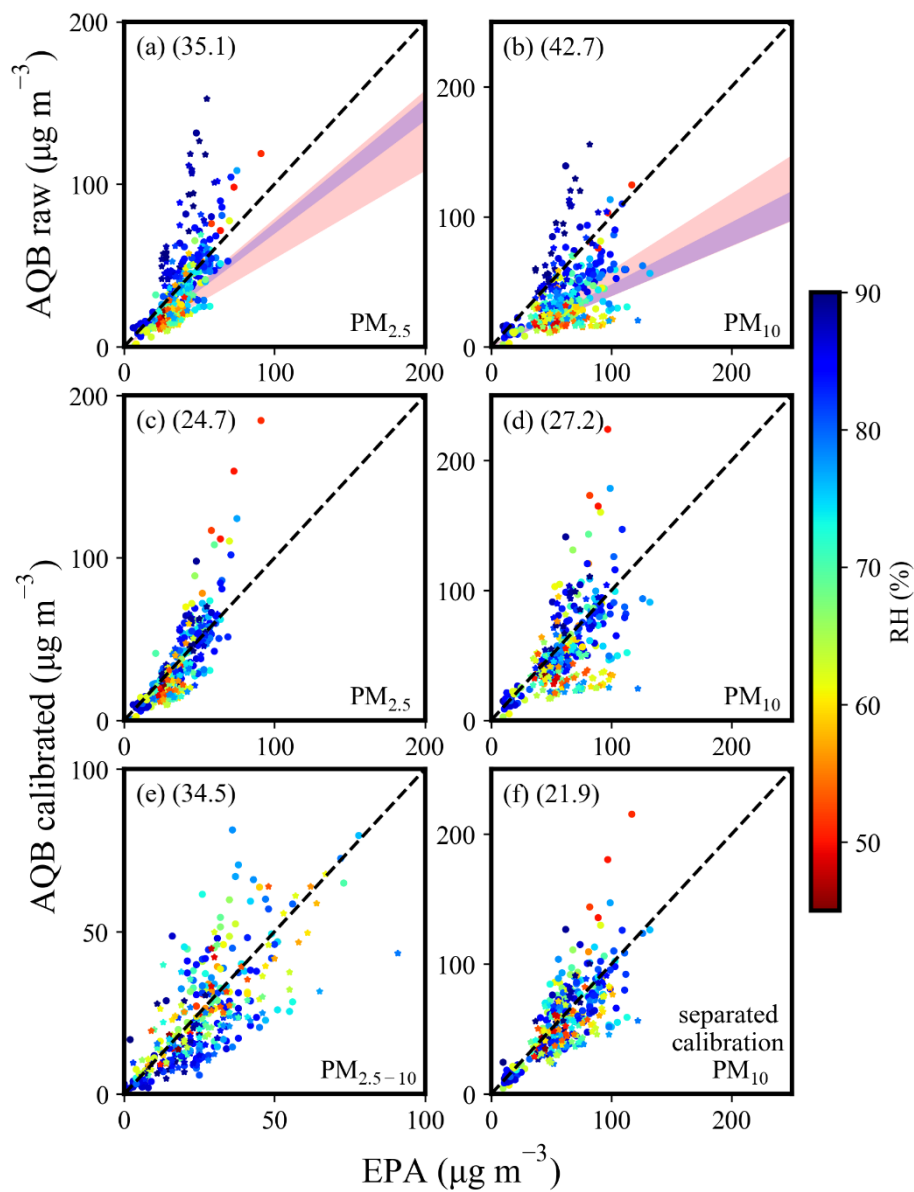

35 **Figure S2: The correlation of mass concentration between EPA and OPC in AQB #2: (a, c)  $PM_{2.5}$ , (b, d)  $PM_{10}$ , (e)  $PM_{2.5-10}$ , and (f) separated calibration  $PM_{10}$ . (a, b) are the raw data, while (c, f) are the calibrated data. Marker color corresponds to relative humidity. The shaded region corresponds to the sensitivity coefficient (“ $\alpha$ ”). The data show the first period (red paved/circle points) and the second period (purple paved/star points). The value in parentheses is the MAPE in percentage.**

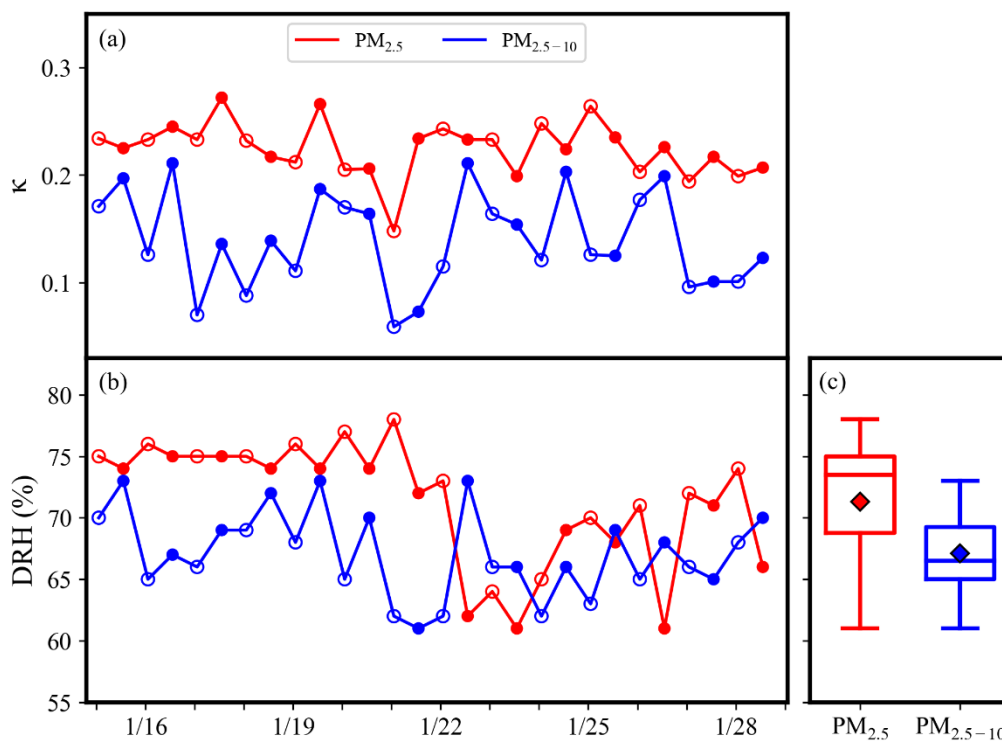

40

**Figure S3: The temporal profiles of (a) derived  $\kappa$  by ion chromatography and (b) DRH determined from E-AIM and (c) box-plot distribution for the 2013 winter campaign period. (hollow circle: daytime samples; solid circle: nighttime samples; diamond: mean value; outliers:  $< 1st\ quartile\ Q1-1.5\ interquartile\ range\ (IQR)$  or  $> 3rd\ quartile\ Q3+1.5\ IQR$ ).**

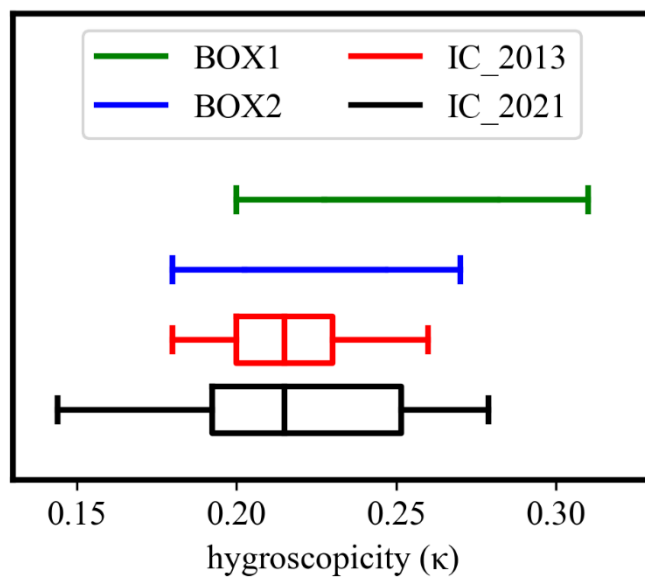

45

**Figure S4: The hygroscopicity of PM<sub>2.5</sub> derived by AQB and ion chromatography with the assumption particle density of 1.2 g cm<sup>-3</sup>. The samples of year 2021 were collected at the National Kaohsiung University of Science and Technology (22°46'22.4" N 120°24'03.4" E) in Kaohsiung for the period of 8 – 18 December 2021.**



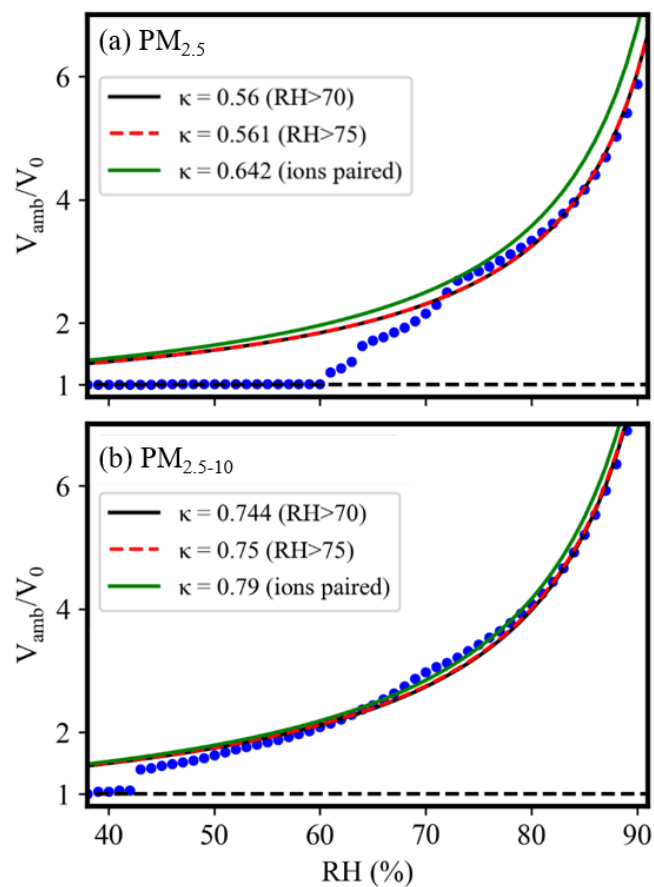

50

**Figure S5: The volume ratio (ambient state compared to dry state) as a function of RH for (a) integrated fine particles and (b) coarse particles using E-AIM and the fitting lines using  $\kappa$ -Köhler equation (Eq. 2) with data points above the threshold as indicated in the legend. (sample mean composition, the molarity ratio of  $\text{Na}^+:\text{NH}_4^+:\text{Cl}^-:\text{SO}_4^{2-}:\text{NO}_3^-$  is 14:458:0:142:6 and 65:59:16:19:70 for  $\text{PM}_{2.5}$  and  $\text{PM}_{2.5-10}$ , respectively. There is no insoluble composition taken into account in the calculation)**

55

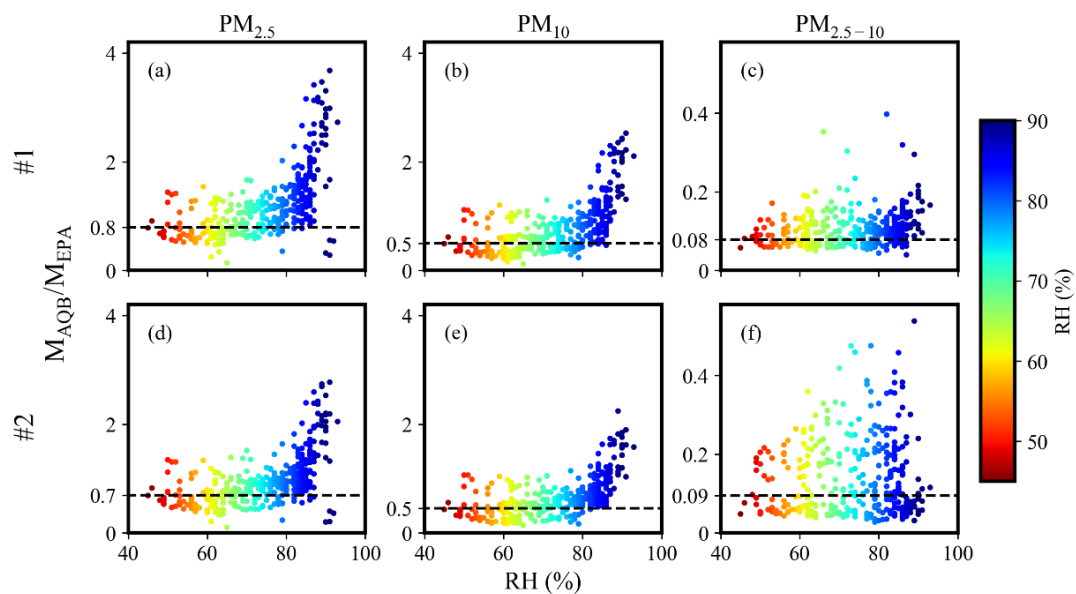

**Figure S6: The mass ratio (ambient state compared to dry state) as a function of RH for (a, d) PM<sub>2.5</sub>, (b, e) PM<sub>10</sub>, (c, f) PM<sub>2.5-10</sub> using AQB#1 and #2 data compared. Marker color corresponds to relative humidity. The dashed lines indicate the inverse of the sensitivity coefficient ( $\alpha$ ) obtained from data at RH < 50 %.**

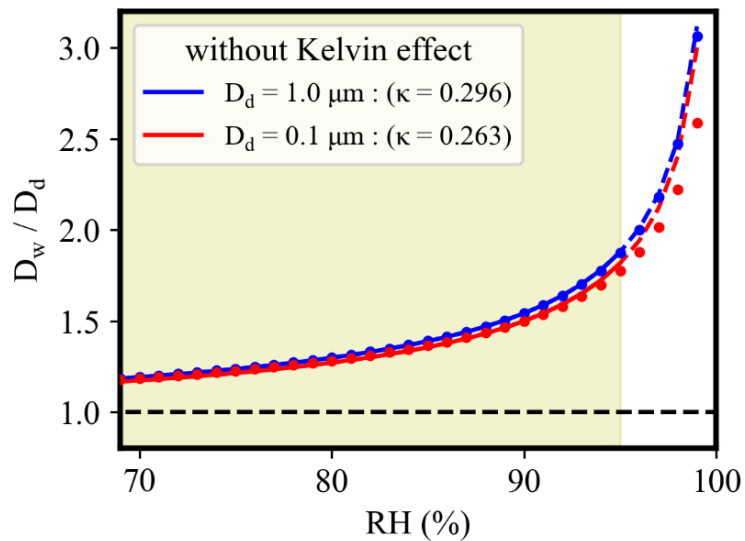

60

**Figure S7: The particle growth diameter ratio as a function of RH for particle sizes of 0.1 (red) and 1.0 (blue)  $\mu\text{m}$ . Points are diameter ratio with Kelvin effect at  $\kappa = 0.3$  for 70-95 % of RH using Eq. 2, and solid lines are the fitting results without Kelvin effect.**

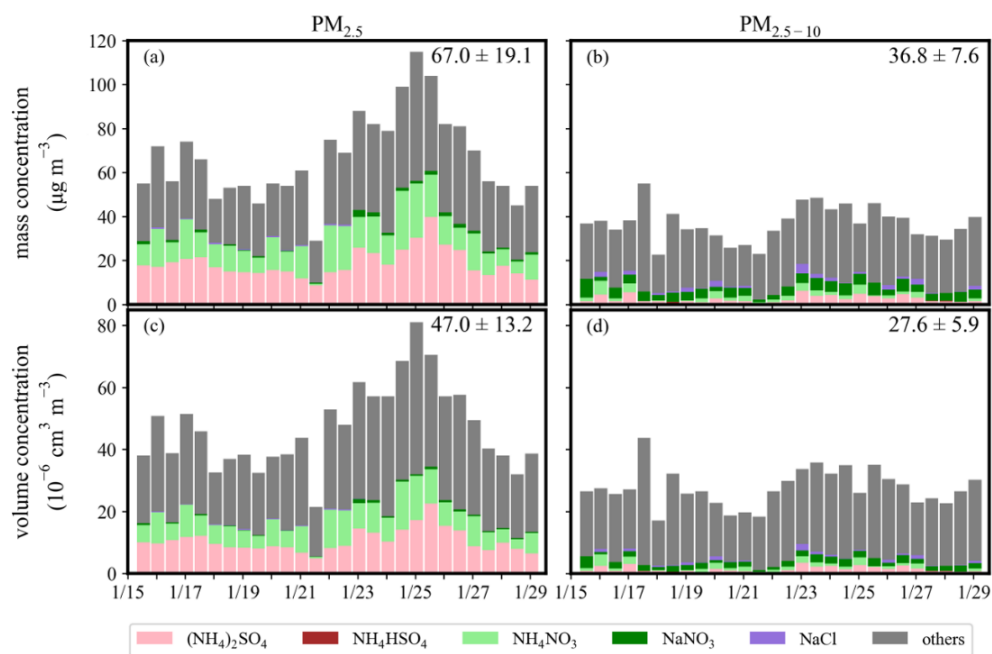

65

**Figure S8:** The temporal profiles of mass and volume concentration for (a, c)  $PM_{2.5}$  and (b, d)  $PM_{2.5-10}$ . Column color corresponds to the contribution of different components. (others are characterized as secondary organic compositions having a density of  $1.2 \text{ g cm}^{-3}$ ). The number on the upper right corner is the mean  $\pm$  1 SD.
